# Supplementary material for: Preexisting Virus-Specific T Lymphocytes-Mediated Enhancement of Adenovirus Infections to Human Blood CD14+ Cells
Source: PubMed Central journal article supplement (PMC6409799; doi:10.3390/v11020154), 2019-02-13
Supplement: viruses-11-00154-s001.pdf [file viruses-11-00154-s001.pdf]

**Supplementary Table 1. Primer sets for qRT-PCR in this study**

| Gene            | Primer             | Sequence                 |
|-----------------|--------------------|--------------------------|
| CAR             | CAR-F              | CTGTCAGCCACATATTGAGAT    |
|                 | CAR-R              | CGCCATTTTGAAGACCA        |
| $\alpha\beta 5$ | $\alpha\beta 5$ -F | CTCATCGTTTCCATTCCAC      |
|                 | $\alpha\beta 5$ -R | CGAGTTTGGTTTTCTGTCTT     |
| SR-A            | SR-A-F             | CCAGGGACATGGGAATACAA     |
|                 | SR-A-R             | CCAGTGGGACCTCGATCTCC     |
| GM-CSF          | GMC-F              | GAGGTCCTTGTCCATTCCA      |
|                 | GMC-R              | GCAGATAGCCCATTTTCATC     |
| IFN- $\gamma$   | IFNG-F             | AGAGTGTGGAGACCATCAAGGA   |
|                 | IFNG-R             | TGCGTTGGACATTCGAGTCAG    |
| IL-4            | IL4-F              | CAGTTCTACAGCCACCATGAGAA  |
|                 | IL4-R              | CTCTCTCATGATCGTCTTTAGCCT |
| B actin         | Actb-F             | CTGTGCTATGTCGCCCTAGA     |
|                 | Actb- R            | GGAAGGTTGGAAGAGAGCCT     |

F: forward primer; R: reverse primer.

**Supplementary Table 2. The purify of sorted cell populations were determined by FACS assay**

| Samples                                                     | Ad5-seropositive subjects |       |       | Ad5-seronegative subjects |       |       |
|-------------------------------------------------------------|---------------------------|-------|-------|---------------------------|-------|-------|
|                                                             | #1                        | #2    | #3    | #4                        | #5    | #6    |
| percentage of CD19+ B cells in sorted CD3+ T sample (%)     | 1.03                      | 0.54  | 0.83  | 1.63                      | 0.86  | 1.20  |
| percentage of CD3+ T cells in sorted CD3+ T sample (%)      | 90.02                     | 97.20 | 96.57 | 95.56                     | 96.19 | 93.53 |
| percentage of CD19+ B cells in sorted CD19+ sample (%)      | 78.78                     | 79.60 | 80.07 | 77.98                     | 76.23 | 79.71 |
| percentage of CD3+ T cells in sorted CD19+ sample (%)       | 13.92                     | 14.50 | 12.14 | 15.02                     | 11.10 | 13.38 |
| percentage of CD19+ B cells in sorted CD3- sample (%)       | 29.64                     | 31.40 | 30.09 | 31.77                     | 28.05 | 29.94 |
| percentage of CD3+ T cells in sorted CD3- sample (%)        | 1.13                      | 0.68  | 0.75  | 1.69                      | 0.88  | 1.16  |
| percentage of CD19+ B cells in sorted CD19- sample (%)      | 0.01                      | 0.12  | 0.09  | 0.02                      | 0.01  | 0.10  |
| percentage of CD3+ T cells in sorted CD19- sample (%)       | 78.04                     | 81.50 | 79.16 | 72.97                     | 76.53 | 80.19 |
| percentage of CD19+ B cells in sorted CD3-/CD19- sample (%) | 0.42                      | 0.55  | 0.23  | 0.45                      | 0.34  | 0.29  |
| percentage of CD3+ T cells in sorted CD3-/CD19- sample (%)  | 0.17                      | 0.30  | 0.38  | 0.11                      | 0.23  | 0.35  |
